# Supplementary material
Source: PubMed Central journal article supplement (PMC7094422)

Phase

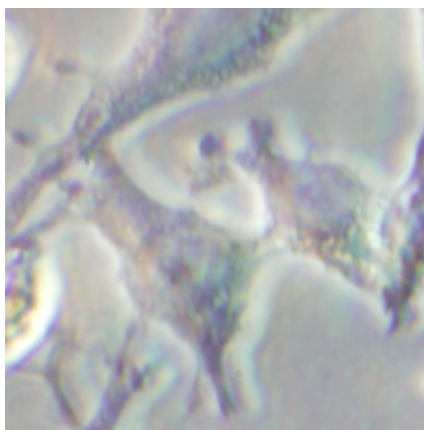

Hoechst

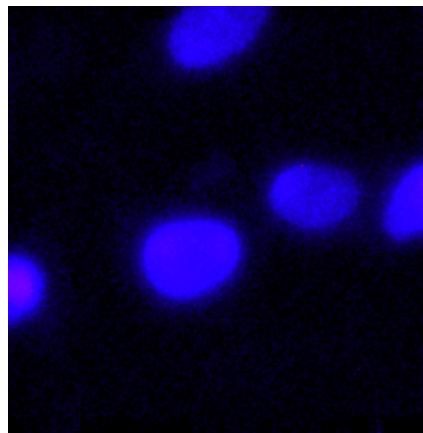

NDV-R18

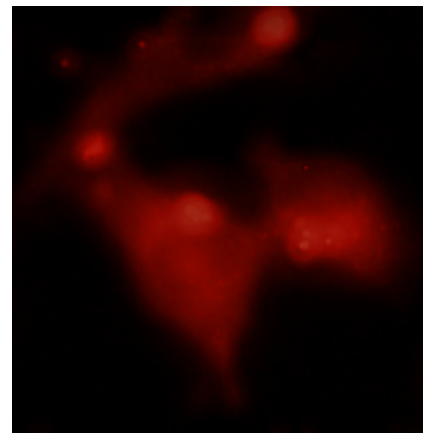

Merge

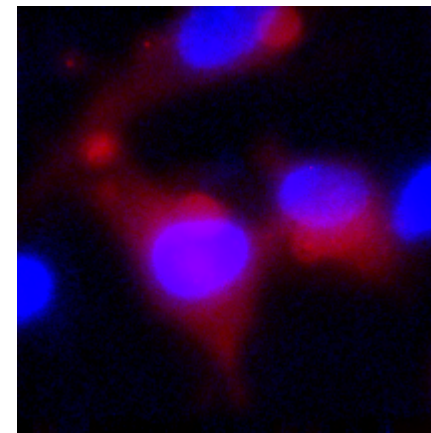

Supplement: mmc1.pdf [file mmc1.pdf]
